# Supplementary material for: High Prevalence of Beijing and EAI4-VNM Genotypes among M. tuberculosis Isolates in Northern Vietnam: Sampling Effect, Rural and Urban Disparities
Source: PubMed Central journal article supplement (PMC3454422; doi:10.1371/journal.pone.0045553), 2012-09-24

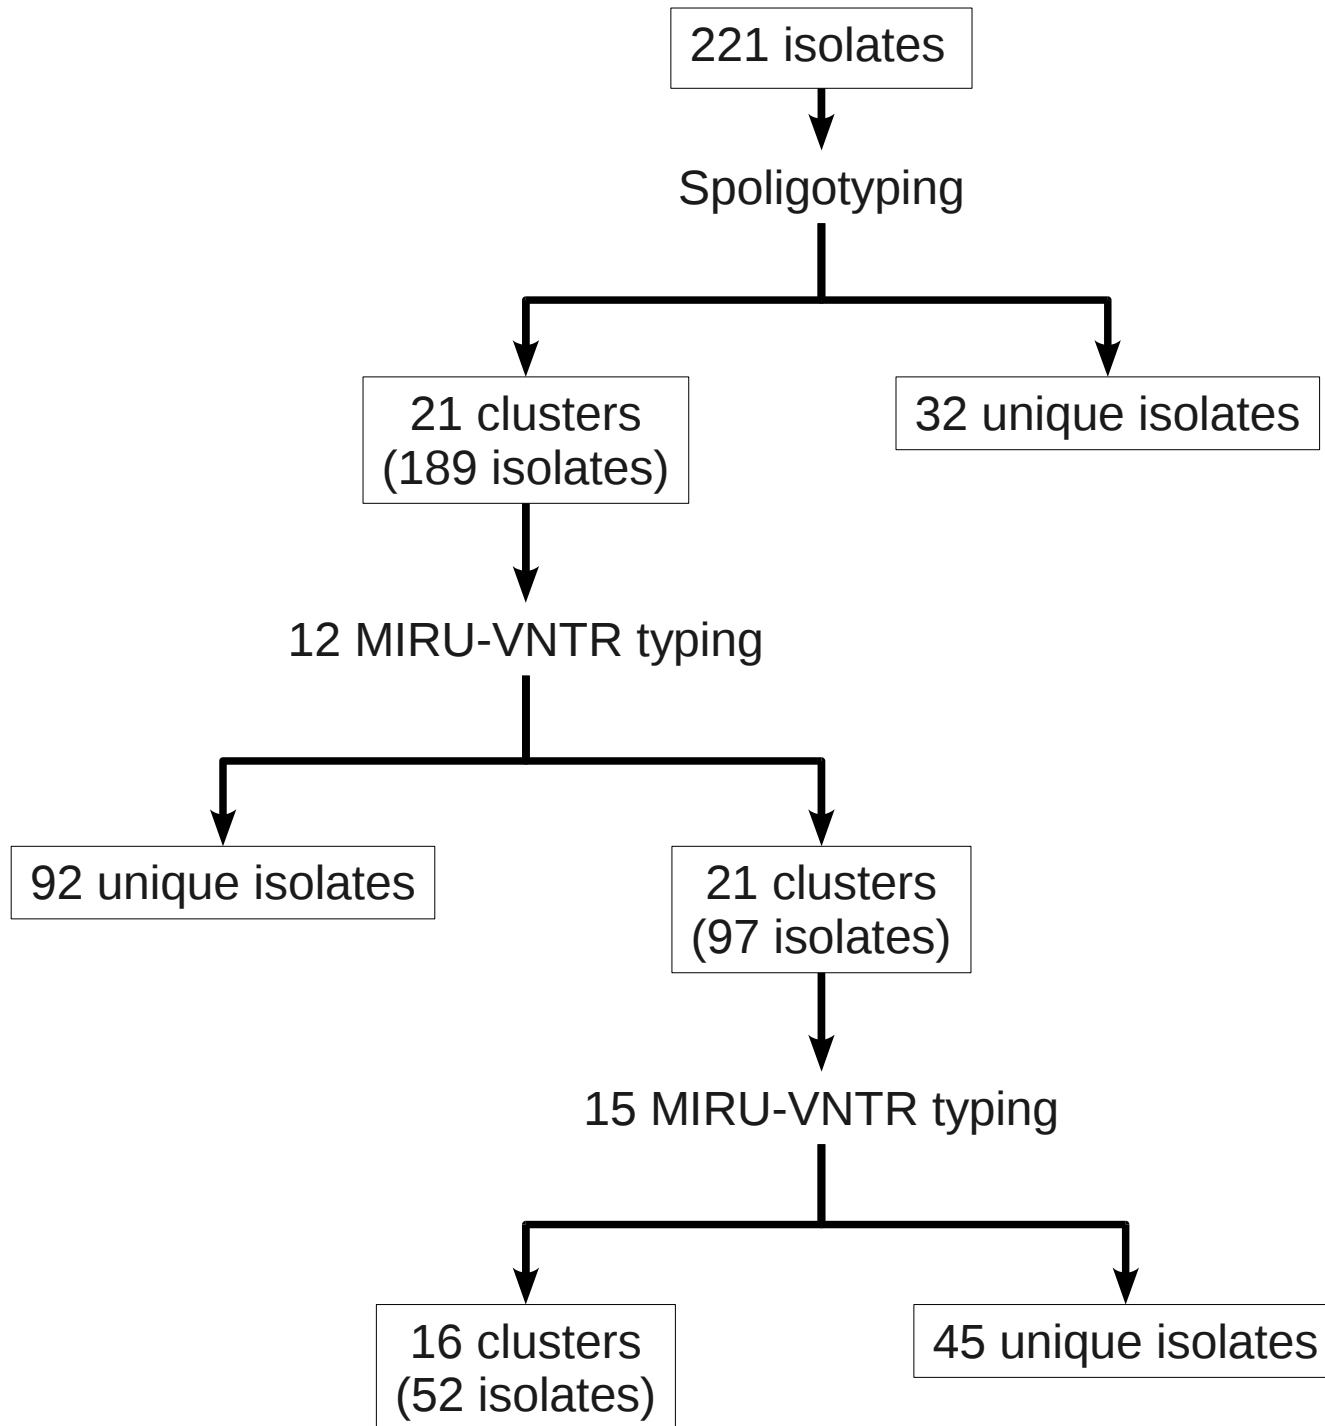

Supplement: pone.0045553.s001.pdf [file pone.0045553.s001.pdf]
