# Supplementary material for: High Prevalence of Beijing and EAI4-VNM Genotypes among M. tuberculosis Isolates in Northern Vietnam: Sampling Effect, Rural and Urban Disparities
Source: PubMed Central journal article supplement (PMC3454422; doi:10.1371/journal.pone.0045553), 2012-09-24
Supplement: pone.0045553.s002.pdf [file pone.0045553.s002.pdf]

|       | hospital      | population     |                                                   |
|-------|---------------|----------------|---------------------------------------------------|
| rural | Ha Tay<br>104 | Hung Yen<br>61 | Data set 2 collected from<br>May to November 2005 |
| urban | Ha Noi<br>56  | 0              |                                                   |

Data set 1 collected from  
Dec. 2003 to Dec. 2004
